# Supplementary material
Source: Springer Nature journal article supplement (https://www.springermedizin.de/resource/supplementary/13058_2011_2873_MOESM6_ESM.pdf/9702762)

## A. IL-6 Release In Vivo (Cynomolgus Monkeys)

### Single dose

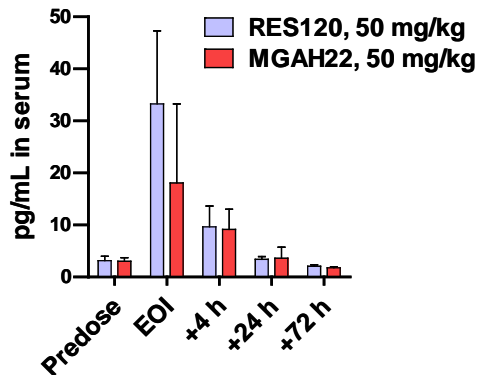

### Repeat dose

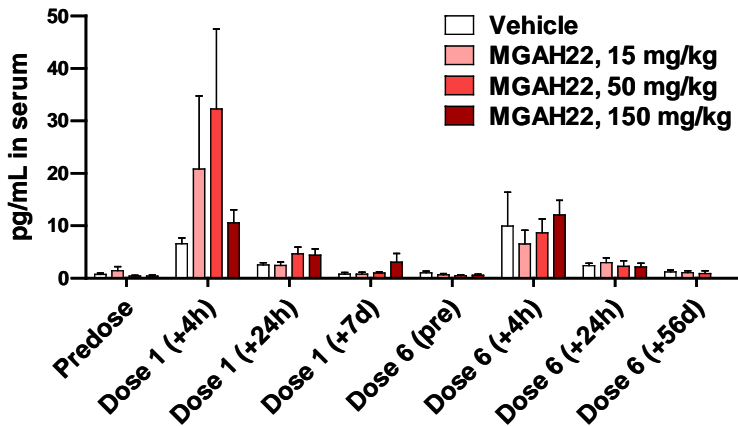

## B. IL-6 Release In Vitro (Human PBMC)

### Without immobilized HER2

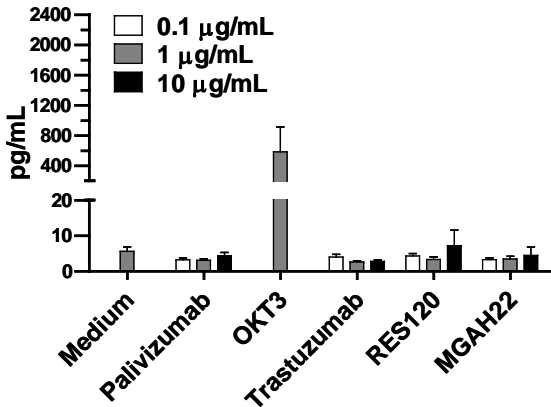

### With immobilized HER2

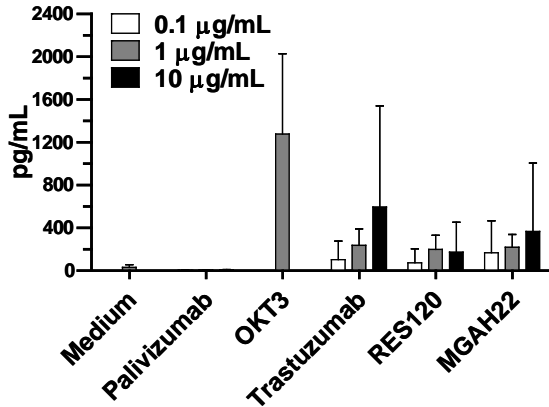

Supplement: MOESM6 [file 9702762]
